# Supplementary material for: Intrinsically disordered intracellular domains control key features of the mechanically-gated ion channel PIEZO2
Source: PubMed Central journal article supplement (PMC8924262; doi:10.1038/s41467-022-28974-6), 2022-03-15
Supplement: 41467_2022_28974_MOESM3_ESM.pdf [file 41467_2022_28974_MOESM3_ESM.pdf]

### **Description of Additional Supplementary Files**

File name: Supplementary Movie 1

Description: TIRF time-lapse imaging showing the lateral diffusion of mScarlet-tagged PIEZO2 clusters. Cluster tracking was performed using TrackMate and individual tracks are shown as yellow lines.

File name: Supplementary Movie 2

Description: TIRF time-lapse imaging showing the lateral diffusion of mScarlet-tagged PIEZO2-IDR5<sup>del</sup> clusters. Cluster tracking was performed using TrackMate and individual tracks are shown as yellow lines.
